# Supplementary material for: East Greenland Ice Sheet retreat history from Scoresby Sund and Storstrømmen Glacier during the last deglaciation
Source: Copernicus journal article supplement (doi:10.5194/cp-21-2263-2025), 2025-11-18
Supplement: Supplementary file 1 [file Supplementary Table 1 and 2.xlsx]

## Sheet: Sheet1
Supplementary Table 1. 10Be measurements
	CAMS ID		Be carrier	Be carrier	9Be	10Be/9Be	1-sig unc	% unc	blk frac.	10Be/9Be	Err	Err%	10Be	Err	Err%
Sample ID		Quartz wt (g)	conc.	solution (g)						blk-corr				[1% Be conc.]
		(g)	(ug/g(sol.))	(g)	(ug)								(at/g)
Uunarteq
22GRO-100	BE55695	15.0053	1041.48	0.182	189.549	7.415e-14	1.63e-15	0.022	0.0114659	7.32998e-14	1.63672e-15	0.0223292	61872.8	1513.79	0.0244661
22GRO-101	BE55696	15.0076	1041.48	0.1821	189.654	7.235e-14	1.813e-15	0.025	0.0117512	7.14998e-14	1.81905e-15	0.0254413	60377.3	1650.48	0.027336
22GRO-102	BE55697	15.071	1041.48	0.1822	189.758	6.698e-14	2.613e-15	0.039	0.0126933	6.61298e-14	2.6172e-15	0.0395767	55638.3	2271.19	0.0408205
22GRO-103	BE55840	15.0799	1041.3	0.1816	189.1	6.81e-14	1.47e-15	0.022	0.0108811	6.7359e-14	1.47565e-15	0.0219072	56442.8	1359.24	0.0240817
22GRO-104	BE55841	15.115	1041.3	0.1802	187.642	1.46e-13	2.79e-15	0.019	0.00507534	1.45259e-13	2.79298e-15	0.0192276	120499	2611.53	0.0216726
Kap Brewster (Kangikajiip Appalia)
22GRO-126	BE55698	15.0108	1041.48	0.1822	189.758	7.178e-14	1.86e-15	0.026	0.0118445	7.09298e-14	1.86589e-15	0.0263062	59916.1	1686.21	0.0281428
22GRO-127	BE55699	15.0219	1041.48	0.1829	190.487	8.311e-14	1.964e-15	0.024	0.0102298	8.22598e-14	1.96958e-15	0.0239435	69702.3	1808.62	0.0259478
22GRO-128	BE55842	15.0575	1041.3	0.1813	188.788	8.64e-14	1.64e-15	0.019	0.00857639	8.5659e-14	1.64507e-15	0.0192048	71765.1	1553.88	0.0216524
22GRO-131	BE55700	15.0074	1041.48	0.1824	189.966	8.748e-14	1.835e-15	0.021	0.00971879	8.66298e-14	1.84097e-15	0.0212511	73275.2	1720.97	0.0234863
22GRO-134	BE55843	15.4807	1041.3	0.1807	188.163	8.73e-14	1.65e-15	0.019	0.00848797	8.6559e-14	1.65504e-15	0.0191203	70303.2	1516.96	0.0215774
Rathbone Island
22GRO-139	BE55701	15.0121	1041.48	0.1826	190.174	9.129e-14	1.867e-15	0.02	0.00931318	9.04398e-14	1.87287e-15	0.0207085	76557.8	1760.57	0.0229966
22GRO-140	BE55702	10.6894	1041.48	0.1829	190.487	7.015e-14	1.526e-15	0.022	0.0121197	6.92998e-14	1.53318e-15	0.0221239	82520.7	2003.51	0.0242789
22GRO-142	BE55703	13.9407	1041.48	0.1829	190.487	7.145e-14	1.54e-15	0.022	0.0118992	7.05998e-14	1.54711e-15	0.0219139	64461.9	1552.74	0.0240877
Storstrømmen Glacier
23DMH-CR1-SURFACE	BE56100	20.0171	1038.9	0.1818	188.872	9.014e-14	2.118e-15	0.023	0.0103805	8.93688e-14	2.12365e-15	0.0237627	56347.1	1452.69	0.0257812
23DMH-18	BE56106	13.6752	1038.9	0.1827	189.807	6.437e-14	1.554e-15	0.024	0.00942621	6.35988e-14	1.56169e-15	0.0245553	58985.7	1563.92	0.0265135
23DMH-20	BE55373	20.0224	1041.3	0.1795	186.913	6.893e-14	2.237e-15	0.032	0.0113158	6.815e-14	2.24168e-15	0.0328933	42511.8	1461.55	0.0343798
23DMH-21	BE55374	20.0964	1041.3	0.1792	186.601	7.057e-14	1.425e-15	0.02	0.0110529	6.979e-14	1.43234e-15	0.0205235	43302	988.592	0.0228302
23DMH-22	BE55375	12.4912	1041.3	0.18	187.434	4.544e-14	1.026e-15	0.023	0.0171655	4.466e-14	1.03617e-15	0.0232012	44779.8	1131.34	0.0252646
23DMH-23	BE56107	10.5734	1038.9	0.1821	189.184	3.24481e-14	1.52304e-15	0.047	0.0186996	3.16769e-14	1.53088e-15	0.0483281	37873.1	1869.11	0.0493518
23DMH-24	BE55845	21.6051	1041.3	0.1796	187.017	6.48e-14	1.23e-15	0.019	0.00763889	6.4305e-14	1.23555e-15	0.0192139	37195.5	805.671	0.0216605
23DMH-25	BE56108	14.8147	1038.9	0.1823	189.391	4.54951e-14	1.26426e-15	0.028	0.0133369	4.47239e-14	1.2737e-15	0.0284791	38205.6	1153.19	0.0301838
23DMH-26	BE55846	20.0549	1041.3	0.1807	188.163	5.35e-14	2.02e-15	0.038	0.00925234	5.3005e-14	2.02339e-15	0.0381735	33231.5	1311.37	0.0394616
23DMH-27	BE55376	20.0445	1041.3	0.1796	187.017	6.008e-14	1.269e-15	0.021	0.0129827	5.93e-14	1.27723e-15	0.0215385	36971	877.941	0.0237467
23DMH-28	BE55377	20.0921	1041.3	0.18	187.434	6.181e-14	1.267e-15	0.02	0.0126193	6.103e-14	1.27525e-15	0.0208954	38044	881.29	0.023165
23DMH-29	BE55847	16.7557	1041.3	0.18	187.434	5.54e-14	1.38e-15	0.025	0.00893502	5.4905e-14	1.38495e-15	0.0252245	41040.9	1113.62	0.0271344
23DMH-30	BE56109	15.9229	1038.9	0.1825	189.599	5.31214e-14	1.26455e-15	0.024	0.0114222	5.23502e-14	1.27398e-15	0.0243357	41653.6	1095.91	0.0263102
23DMH-31	BE56110	20.0176	1038.9	0.1824	189.495	6.24367e-14	1.33465e-15	0.021	0.00971809	6.16654e-14	1.3436e-15	0.0217885	39007.5	935.154	0.0239737
23DMH-32	BE55378	17.3814	1041.3	0.1811	188.579	5.325e-14	1.265e-15	0.024	0.0146479	5.247e-14	1.27326e-15	0.0242664	38040	998.403	0.0262461
23DMH-33	BE55379	20.0282	1041.3	0.1808	188.267	6.004e-14	1.295e-15	0.022	0.0129913	5.926e-14	1.30307e-15	0.021989	37223.2	899.167	0.0241561

## Sheet: Sheet2
Supplementary Table 2. 10Be data process blanks
Sample ID	CAMS ID	Be carrier	Be carrier	9Be			10Be	Samples applied to (Supplementary Table 1)
		conc.	solution (g)	(ug)	10Be/9Be	1-sig unc	atoms
BLK-2024-JUN07	BE55380	1041.3	0.1808	188.267	7.8e-16	1.448e-16	9812.86	23DMH-20, -21, -22, -27, -28, -32, -33
BLK-2024-JUN18	BE55704	1041.48	0.183	190.591	8.502e-16	1.482e-16	10828.1	22GRO-100, -101, -102, -126, -127, -131, -139, -140, -142
BLK-2024-AUG12	BE55844	1041.3	0.1797	187.122	7.41e-16	1.29e-16	9265.56	22GRO-103, -104, -128, -134
BLK-2024-AUG13	BE55848	1041.3	0.18	187.434	4.95e-16	1.17e-16	6199.88	23DMH-24, -26, -29
BLK1-2024-SEP19	BE56105	1038.9	0.1825	189.599	9.357e-16	1.77e-16	11855
BLK2-2024-SEP19	BE56111	1038.9	0.1823	189.391	6.06765e-16	1.32525e-16	7679.1
				*avg Blk	7.71233e-16	1.54762e-16		23DMH-18, -23, -25, -30, -31
				*These samples used the average of BLK1-2024-SEP19 and BLK2-2024-SEP19

## Sheet: Sheet3
CRONUS Version 3 input file
Sample	Latitude	Longitude	Elv/Pressure	Elv/Pre flag	Thickness	Density	Shielding	E rate	Collection		Sample	Nuclide-mineral	10Be	Uncertainty	Be-10
name									date		name	pair			standardization
	(decimal)	(decimal)	(m or hPa)	(std/ant/pre)	(cm)	(g/cm3)		(cm/y)					(at/g)	(at/g)
23DMH-CR1-SURF	76.8752	-22.3197	166	std	1.65	2.65	1	0	2023	;	23DMH-CR1-SURF	Be-10 quartz	56347.1	1452.69	07KNSTD	;
23DMH-18	76.8749	-22.3197	161	std	2.79	2.65	1	0	2023	;	23DMH-18	Be-10 quartz	58985.7	1563.92	07KNSTD	;
23DMH-20	76.8756	-22.3165	164	std	2.19	2.65	1	0	2023	;	23DMH-20	Be-10 quartz	42511.8	1461.55	07KNSTD	;
23DMH-21	76.8741	-22.3181	163	std	1.85	2.65	1	0	2023	;	23DMH-21	Be-10 quartz	43302	988.592	07KNSTD	;
23DMH-22	76.857	-22.277	114	std	1.08	2.65	1	0	2023	;	23DMH-22	Be-10 quartz	44779.8	1131.34	07KNSTD	;
23DMH-23	76.8544	-22.281	92	std	3.53	2.65	1	0	2023	;	23DMH-23	Be-10 quartz	37873.1	1869.11	07KNSTD	;
23DMH-24	76.8543	-22.2807	91	std	3.37	2.65	1	0	2023	;	23DMH-24	Be-10 quartz	37195.5	805.671	07KNSTD	;
23DMH-25	76.8543	-22.2824	91	std	2.54	2.65	1	0	2023	;	23DMH-25	Be-10 quartz	38205.6	1153.19	07KNSTD	;
23DMH-26	76.8481	-22.2882	38	std	2.39	2.65	1	0	2023	;	23DMH-26	Be-10 quartz	33231.5	1311.37	07KNSTD	;
23DMH-27	76.8488	-22.2989	90	std	2.4	2.65	1	0	2023	;	23DMH-27	Be-10 quartz	36971	877.941	07KNSTD	;
23DMH-28	76.8511	-22.3069	109	std	1.07	2.65	1	0	2023	;	23DMH-28	Be-10 quartz	38044	881.29	07KNSTD	;
23DMH-29	76.8687	-22.3197	152	std	3.67	2.65	1	0	2023	;	23DMH-29	Be-10 quartz	41040.9	1113.62	07KNSTD	;
23DMH-30	76.8691	-22.3229	151	std	2.41	2.65	1	0	2023	;	23DMH-30	Be-10 quartz	41653.6	1095.91	07KNSTD	;
23DMH-31	76.8743	-22.3491	124	std	3.07	2.65	1	0	2023	;	23DMH-31	Be-10 quartz	39007.5	935.154	07KNSTD	;
23DMH-32	76.8895	-22.3271	127	std	2.01	2.65	1	0	2023	;	23DMH-32	Be-10 quartz	38040	998.403	07KNSTD	;
23DMH-33	76.894	-22.3273	125	std	2.22	2.65	1	0	2023	;	23DMH-33	Be-10 quartz	37223.2	899.167	07KNSTD	;
22GRO-100	70.448	-21.8879	99	std	3	2.65	0.998	0	2022	;	22GRO-100	Be-10 quartz	61873	1513.78	07KNSTD	;
22GRO-101	70.448	-21.8879	99	std	3	2.65	0.998	0	2022	;	22GRO-101	Be-10 quartz	60377.5	1650.47	07KNSTD	;
22GRO-102	70.4479	-21.8876	94	std	3	2.65	0.998	0	2022	;	22GRO-102	Be-10 quartz	55638.5	2271.18	07KNSTD	;
22GRO-103	70.4479	-21.888	91	std	3	2.65	0.994	0	2022	;	22GRO-103	Be-10 quartz	56442.8	1359.24	07KNSTD	;
22GRO-104	70.4477	-21.888	103	std	3	2.65	0.998	0	2022	;	22GRO-104	Be-10 quartz	120499	2611.53	07KNSTD	;
22GRO-126	70.151	-22.0754	225	std	3	2.4	1	0	2022	;	22GRO-126	Be-10 quartz	59916.3	1686.2	07KNSTD	;
22GRO-127	70.1511	-22.076	231	std	3	2.4	1	0	2022	;	22GRO-127	Be-10 quartz	69702.5	1808.61	07KNSTD	;
22GRO-128	70.1511	-22.0761	233	std	3	2.4	1	0	2022	;	22GRO-128	Be-10 quartz	71765.1	1553.88	07KNSTD	;
22GRO-131	70.1508	-22.0766	227	std	3	2.4	1	0	2022	;	22GRO-131	Be-10 quartz	73275.4	1720.95	07KNSTD	;
22GRO-134	70.15	-22.0756	230	std	3	2.65	1	0	2022	;	22GRO-134	Be-10 quartz	70303.2	1516.96	07KNSTD	;
22GRO-139	70.6661	-21.3985	118	std	3	2.65	1	0	2022	;	22GRO-139	Be-10 quartz	76558	1760.56	07KNSTD	;
22GRO-140	70.6667	-21.3991	119	std	3	2.65	1	0	2022	;	22GRO-140	Be-10 quartz	82520.9	2003.49	07KNSTD	;
22GRO-142	70.666	-21.404	97	std	2.5	2.65	1	0	2022	;	22GRO-142	Be-10 quartz	64462.1	1552.72	07KNSTD	;

## Sheet: Sheet4
Production rate calibration results		Arctic production rate calibration input (Young et al., 2013)
Version info:		FST08-01 69.20220 -51.08780 80.00000 std 1.0 2.65 0.9990 0 0;
		FST08-01 true_t TASIUSSAQ-N 8177 360;
wrapper: 3.0.2		FST08-01 Be-10 quartz 38944.000 662.000 07KNSTD;
get_age: 3.0.2		FST08-02 69.20190 -51.08600 80.00000 std 1.0 2.65 0.9990 0 0;
muons: 1A, alpha = 1		FST08-02 true_t TASIUSSAQ-N 8177 360;
validate: validate_v3_input.m - 3.0		FST08-02 Be-10 quartz 36884.000 738.000 07KNSTD;
consts: 2024-08-26		09GRO-08 69.11310 -51.03710 175.00000 std 1.0 2.65 1.0000 0 0;
		09GRO-08 true_t TASIUSSAQ-S 8177 360;
Calibration data set name: Less than 70 characters (0.5 tweets), please. No special characters.		09GRO-08 Be-10 quartz 42052.000 1043.000 07KNSTD;
Calibration results:		09GRO-09 69.11300 -51.03600 175.00000 std 1.0 2.65 1.0000 0 0;
		09GRO-09 true_t TASIUSSAQ-S 8177 360;
Nuclide/target actually calibrated: Be-10 (qtz)		09GRO-09 Be-10 quartz 42303.000 800.000 07KNSTD;
		09GRO-11 69.11290 -51.03440 175.00000 std 4.0 2.65 1.0000 0 0;
Age calculations with all other nuclides are unaffected; they retain default parameters.		09GRO-11 true_t TASIUSSAQ-S 8177 360;
		09GRO-11 Be-10 quartz 40487.000 937.000 07KNSTD;
St scaling. Fitting parameter: 4.056		09GRO-12 69.11300 -51.03430 175.00000 std 3.0 2.65 1.0000 0 0;
Uncertainty by total scatter: 0.105 (2.6%)		09GRO-12 true_t TASIUSSAQ-S 8177 360;
Chi-squared (all samples) is 10.48 for 17 DOF; p = 0.882		09GRO-12 Be-10 quartz 41669.000 963.000 07KNSTD;
Uncertainty by site-to-site scatter: 0.062 (1.5%)		CI2-01-1 69.83530 -70.49700 65.00000 std 5.0 2.65 1.0000 0 2003;
Chi-squared (all sites) is 1.77 for 3 DOF; p = 0.621		CI2-01-1 true_t CLYDE 8193 170;
		CI2-01-1 Be-10 quartz 37693.000 998.000 07KNSTD;
Lm scaling. Fitting parameter: 4.056		CI2-01-2 69.83450 -70.49800 65.00000 std 4.0 2.65 1.0000 0 2003;
Uncertainty by total scatter: 0.105 (2.6%)		CI2-01-2 true_t CLYDE 8193 170;
Chi-squared (all samples) is 10.48 for 17 DOF; p = 0.882		CI2-01-2 Be-10 quartz 37323.000 749.000 07KNSTD;
Uncertainty by site-to-site scatter: 0.062 (1.5%)		CR-03-90 69.83020 -70.49620 72.00000 std 2.0 2.65 1.0000 0 2003;
Chi-squared (all sites) is 1.77 for 3 DOF; p = 0.621		CR-03-90 true_t CLYDE 8193 170;
		CR-03-90 Be-10 quartz 36510.000 775.000 07KNSTD;
LSDn scaling. Fitting parameter: 0.779		CR-03-91 69.83180 -70.49580 67.00000 std 2.0 2.65 1.0000 0 2003;
Uncertainty by total scatter: 0.018 (2.3%)		CR-03-91 true_t CLYDE 8193 170;
Chi-squared (all samples) is 8.67 for 17 DOF; p = 0.950		CR-03-91 Be-10 quartz 36581.000 837.000 07KNSTD;
Uncertainty by site-to-site scatter: 0.010 (1.2%)		CR-03-92 69.83180 -70.49580 67.00000 std 2.0 2.65 1.0000 0 2003;
Chi-squared (all sites) is 1.21 for 3 DOF; p = 0.751		CR-03-92 true_t CLYDE 8193 170;
		CR-03-92 Be-10 quartz 37186.000 806.000 07KNSTD;
		CR-03-93 69.83240 -70.49670 67.00000 std 3.0 2.65 1.0000 0 2003;
		CR-03-93 true_t CLYDE 8193 170;
		CR-03-93 Be-10 quartz 36606.000 718.000 07KNSTD;
		CR-03-94 69.83280 -70.49750 65.00000 std 2.0 2.65 1.0000 0 2003;
		CR-03-94 true_t CLYDE 8193 170;
		CR-03-94 Be-10 quartz 38965.000 860.000 07KNSTD;
		39-11QOO-01 69.28441 -50.75686 350.00000 std 1.5 2.65 0.9950 0 2011;
		39-11QOO-01 true_t MARRAIT 9175 45;
		39-11QOO-01 Be-10 quartz 55580.000 1848.000 07KNSTD;
		39-11QOO-02 69.28441 -50.75686 350.00000 std 1.5 2.65 0.9950 0 2011;
		39-11QOO-02 true_t MARRAIT 9175 45;
		39-11QOO-02 Be-10 quartz 55809.000 1062.000 07KNSTD;
		39-11QOO-03 69.28441 -50.75663 350.00000 std 1.0 2.65 0.9950 0 2011;
		39-11QOO-03 true_t MARRAIT 9175 45;
		39-11QOO-03 Be-10 quartz 57094.000 1118.000 07KNSTD;
		39-11QOO-04 69.28439 -50.75616 350.00000 std 1.2 2.65 0.9950 0 2011;
		39-11QOO-04 true_t MARRAIT 9175 45;
		39-11QOO-04 Be-10 quartz 55420.000 1241.000 07KNSTD;
		39-11QOO-05 69.28419 -50.75277 350.00000 std 1.0 2.65 0.9960 0 2011;
		39-11QOO-05 true_t MARRAIT 9175 45;
		39-11QOO-05 Be-10 quartz 56361.000 1259.000 07KNSTD;
