# Supplementary material for: East Greenland Ice Sheet retreat history from Scoresby Sund and Storstrømmen Glacier during the last deglaciation
Source: Copernicus journal article supplement (doi:10.5194/cp-21-2263-2025), 2025-11-18
Supplement: Supplementary file 3 [file Supplementary Table 3.xlsx]

## Sheet: Sheet1
Supplementary Table 3 Radiocarbon ages from eastern Greenland
Sample number	Latitude	Longitude	Location / core site	Material dated	Radiocarbon age (14C yr BP)	Radiocarbon age uncertainty (1 sigma)	Calibrated age (cal yr BP, median)	Calibrated age range (cal yr. BP, 2 sigma)	ΔR	Uncertainty	Marine / terrestrial	Reference	DOI	# of data points
Northeast Greenland shelf
ETH-106030	80.037	-8.923	DA17-NG-ST03-039G	Mixed planktonic foraminifera	12070	60	13291*	13202-13584*	0	0	Marine	Hansen et al. (2022)	https://doi.org/10.1016/j.quascirev.2022.107704	npts 10
ETH-113888	78.5009	-16.2785	DA17-NG-ST08–092G	Mixed benthic foraminifera	10200	190	12473*	11268-12595*	1	32	Marine	Davies et al. (2022)	https://doi.org/10.1016/j.quascirev.2022.107530	npts 10
AWI 2795.1.1	77.4972	-18.14	PS100/270	Mixed benthic foraminifera	9437	104	10138	9670 - 10568	-33	109	Marine	Syring et al. (2020)	https://doi.org/10.1029/2020pa004019	npts 2
121063.1.1	77.1275	-10.6756	DA17-NG-ST12–135G	Mixed benthic foraminifera	14450	220	16684	16080 - 17285	-26	61	Marine	Lopez-Quiros et al. (2024)	https://doi.org/10.1016/j.quascirev.2023.108477	npts 4
Lambert Land
442909	79.1067	-19.7533	Zachariae Isstrom	Marine bivalve	7595	55	7905	7624 - 8184	-33	109	Marine	Bennike and Weidick (2001)	https://doi.org/10.1111/j.1502-3885.2001.tb01223.x	npts 2
Clavering Ø
I-9659	74.35	-21.8667	Clavering Ø	Marine bivalve	8195	125	8148	7050 - 9396	392	511	Marine	Weidick (1978)	https://doi.org/10.34194/rapggu.v90.7609	npts 4
Kejser Franz Joseph Fjord
MM/G3	73.55	-25.1167	Kejser Franz Joseph Fjord	Marine bivalve	8020	100	8078	7179 - 9086	266	418	Marine	Wagner and Melles (2002)	https://doi.org/10.1016/S1040-6182(01)00087-8	npts 9
60282.1.1	73.6752	-24.1822	HH13-012	Mixed benthic foram	7470	130	7471	6518 - 8376	287	417	Marine	Olsen et al. (2022)	https://doi.org/10.1016/j.quascirev.2022.107504	npts 8
4491.1.1	73.4747	-24.606	PS2633	Foraminifera	8376	84	8452	7550 - 9447	287	417	Marine	Olsen et al. (2022)	https://doi.org/10.1016/j.quascirev.2022.107504	npts 8
PS2630	73.158	-18.068	PS2630	N pachyderma	13560	130	15544	15113 - 15989	-28	73	Marine	Evans et al. (2002)	https://doi.org/10.1144/GSL.SP.2002.203.01.09	npts 3
Kong Oscar Fjord
I-9104	73.35	-26.4667	Kong Oscar Fjord	Marine bivalve	7760	115	7985	7654 - 8329	59	103	Marine	Weidick (1977)	https://doi.org/10.34194/rapggu.v85.7545	npts 5
I-9658	73.1667	-27.4167	Kong Oscar Fjord	Marine bivalve	7160	125	7428	7067 - 7779	31	111	Marine	Weidick (1978)	https://doi.org/10.34194/rapggu.v90.7609	npts 9
Lu-1070	72.7167	-26.8333	Kong Oscar Fjord	Marine bivalve	7530	75	7698	7150 - 8297	126	269	Marine	Håkansson (1976)	https://doi.org/10.1017/S0033822200003179	npts 9
Scoresby Sund
UtC-7428	70.595	-21.535	Scoresby Sund	Plant macrofossil	8900	50	10026	9887 - 10197	n/a	n/a	Terrestrial	Cremer et al. (2001)	https://doi.org/10.1023/A:1011179321529	npts 10
AAR-199	70.3375	-23.7085	PS1715-1	Foraminifera	10340	150	11250	10674 - 11819	75	111	Marine	Marienfeld (1990)	10013/epic.12636	npts 4
AAR-200	70.4825	-24.6745	PS1719-1	Foraminifera	10480	190	11645	11058 - 12392	-59	117	Marine	Marienfeld (1990)	10013/epic.12636	npts 4
AAR-202	70.7082	-24.9995	PS1728-1	Foraminifera	10760	120	12023	11503 - 12486	-28	95	Marine	Marienfeld (1990)	10013/epic.12636	npts 5
AAR-201	70.9282	-24.9838	PS1727-1	Foraminifera	9080	650	9589	7952 - 11272	74	113	Marine	Marienfeld (1990); Dowdeswell et al. (1994)	https://doi.org/10.1111/j.1365-3091.1994.tb01390.x	npts 5
K-1461	71.1667	-25.3333	Scoresby Sund	Marine bivalve	9040	140	9650	9275 - 10108	-47	59	Marine	Funder (1978)	https://doi.org/10.34194/bullggu.v129.6671	npts 8
K-3109	70.5	-23.45	Scoresby Sund	Marine bivalve	10560	145	11726	11199 - 12318	-39	106	Marine	Funder (1990)	https://doi.org/10.1016/j.quascirev.2020.106223	npts 3
AAR-636	70.5333	-23.6333	Scoresby Sund	Marine bivalve	9170	140	9764	9398 - 10183	-10	61	Marine	Gulliksen et al. (1991)		npts 4
I-9492	70.5	-26.1833	Scoresby Sund	Marine bivalve	9925	140	10882	10395 - 11310	-86	75	Marine	Funder (1978)	https://doi.org/10.34194/bullggu.v129.6671	npts 4
AAR-3368	70.3867	-23.8667	Scoresby Sund	Plant macrofossils	9780	160	11186	10695 - 11743	n/a	n/a	Terrestrial	Hansen (2001)	https://doi.org/10.1111/j.0435-3676.2001.00149.x
100380, 100381	70.8433	-24.0083	Scoresby Sund	Plant macrofossils	9665	55	11058	10780 - 11207	n/a	n/a	Terrestrial	Bennike et al. (1999)	https://doi.org/10.1046/j.1365-2699.1999.t01-1-00315.x
AAR-2540	70.85	-24.0167	Scoresby Sund	Plant macrofossils	10130	130	11729	11257 - 12177	n/a	n/a	Terrestrial	Bennike et al. (1999)	https://doi.org/10.1002/jqs.670
AAR-3369	70.85	-24.0667	Scoresby Sund	Plant macrofossils	9440	65	10681	10501 - 11069	n/a	n/a	Terrestrial	Hansen (2001)	https://doi.org/10.1111/j.0435-3676.2001.00149.x
AAR-3802	70.85	-24.15	Scoresby Sund	Marine bivalve	9985	60	10915	10581 - 11203	-46	87	Marine	Hansen (2001)	https://doi.org/10.1111/j.0435-3676.2001.00149.x	npts 4
AAR-2571	70.9853	-23.9972	Scoresby Sund	Plant macrofossils	7900	100	8751	8464 - 9006	n/a	n/a	Terrestrial	Böcher and Bennike (1996)	https://doi.org/10.1016/j.quascirev.2020.106223
AAR-1829	70.9594	-24.1136	Scoresby Sund	Marine bivalve	10140	100	11126	10696 - 11557	-46	87	Marine	Funder and Hansen (1996)		npts 4
AAR-2541	70.95	-24.1167	Scoresby Sund	Plant macrofossils	9910	130	11411	10885 - 11873	n/a	n/a	Terrestrial	Hansen (2001)	https://doi.org/10.1111/j.0435-3676.2001.00149.x
AAR-644	70.9136	-24.2072	Scoresby Sund	Marine bivalve	9670	180	10486	9930 - 11085	-46	87	Marine	Ingolfsson et al. (1994)	https://doi.org/10.1111/j.1502-3885.1994.tb00612.x	npts 4
87516	71.5667	-23.9667	Scoresby Sund	Plant macrofossils	7000	390	7848	7003 - 8601	n/a	n/a	Terrestrial	Böcher and Bennike (1996); Bennike et al. (1999)	https://doi.org/10.1046/j.1365-2699.1999.t01-1-00315.x
K-1915	71.35	-24.8333	Scoresby Sund	Marine bivalve	10300	120	11423	11018 - 11902	-87	83	Marine	Funder (1978)	https://doi.org/10.34194/bullggu.v129.6671	npts 3
I-5421	70.95	-28.15	Scoresby Sund	Marine bivalve	7540	130	7863	7560 - 8182	-45	60	Marine	Funder (1978)	https://doi.org/10.34194/bullggu.v129.6671	npts 7
Kangerlussuaq Trough
AA-4026	66.203	-30.655	10A	Foraminifera	13585	110	15628	15259 - 15995	-66	32	Marine	Williams (1993)	https://doi.org/10.1029/92PA02591	npts 4
AA-6848	66.764	-30.84	PO-175/15	Foraminifera	14845	190	17229	16717 - 17791	-66	32	Marine	Williams et al. (1995)	https://www.tandfonline.com/doi/citedby/10.1080/00040851.1995.12003132?scroll=top&needAccess=true&role=tab	npts 4
AA-11584	68.116	-31.432	91-K11A	Foraminifera	9975	100	10942	10585 - 11239	-80	51	Marine	Andrews et al. (1997)	https://onlinelibrary.wiley.com/doi/10.1002/(SICI)1099-1417(199701/02)12:1%3C1::AID-JQS288%3E3.0.CO;2-T	npts 6
CAMS-32047	68.1	-29.35	JM96-1207	Foraminifera	9800	60	10731	10495 - 11037	-97	28	Marine	Jennings et al. (2002)	https://doi.org/10.1191/0959683602hl519rp	npts 4
AA-29205	67.3	-30.967	JM96-1214/2GC	Benthic foraminifera	11380	80	12786	12601 - 13009	-67	30	Marine	Smith and Licht (2000); Jennings et al. (2006)	https://doi.org/10.1016/j.quascirev.2005.04.006	npts 5
AA-32045	67.047	-30.86	JM96-1215/2GC	Benthic and planktic foraminifera	12900	50	14693	14326 - 15010	-80	51	Marine	Smith and Licht (2000); Jennings et al (2006)	https://doi.org/10.1016/j.quascirev.2005.04.006	npts 6
AA-23221	65.963	-30.633	JM96-1216/2-GC	Benthic foraminifera	14550	150	16862	16423 - 17296	-67	30	Marine	Smith and Licht (2000); Jennings et al. (2006)	https://doi.org/10.1016/j.quascirev.2005.04.006	npts 5
AA-43116	68.093	-27.836	MD99-2317	Bryozoans	11950	110	13405	13122 - 13717	-127	51	Marine	Jennings et al. (2006)	https://doi.org/10.1016/j.quascirev.2005.04.006	npts 6
AA-4666	67.41	-31.066	3	Foraminifera	9375	70	10133	9818 - 10424	-87	57	Marine	Williams (1993); Mienert et al. (1992)	https://doi.org/10.1029/92PA02591	npts 7
*Modelled median age derived from age-depth model (Davies et al., 2022; Hansen et al., 2022).
