# Supplementary material for: East Greenland Ice Sheet retreat history from Scoresby Sund and Storstrømmen Glacier during the last deglaciation
Source: Copernicus journal article supplement (doi:10.5194/cp-21-2263-2025), 2025-11-18
Supplement: Supplementary file [file cp-21-2263-2025-supplement-title-page.pdf › cp-21-2263-2025-supplement-title-page.pdf]

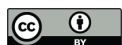

## *Supplement of*

# **East Greenland Ice Sheet retreat history from Scoresby Sund and Storstrømmen Glacier during the last deglaciation**

**Jacob T. H. Anderson et al.**

*Correspondence to:* Jacob T. H. Anderson ([janderson@ldeo.columbia.edu](mailto:janderson@ldeo.columbia.edu))

- [cp-21-2263-2025-supplement-title-page.pdf](#)
- [Anderson\\_\\_Supplement\\_cotp](#)
  - [Supplementary Table 1 and 2.xlsx](#)
  - [Supplementary Table 3.xlsx](#)

The copyright of individual parts of the supplement might differ from the article licence.
